# Supplementary material for: The T3SS Effector Protease NleC Is Active within Citrobacter rodentium
Source: MDPI journal article supplement (doi:10.3390/pathogens10050589), 2021-05-12
Supplement: s1 [file s1]

**Supplementary Table. Edman degradation analysis of p65 C-terminal cleavage product.**

| <b>Cycle #</b> | <b>PTH-amino acid</b> | <b>Yield (pmol) Replicate 1</b> | <b>Yield (pmol) Replicate 2</b> |
|----------------|-----------------------|---------------------------------|---------------------------------|
| 1              | Glu (E)               | 2.5                             | 6.2                             |
| 2              | Gly (G)               | 15.7                            | 19.7                            |
| 3              | Arg (R)               | 19.4                            | 49.5                            |
| 4              | Ser (S)               | 5.9                             | 3.4                             |
| 5              | Ala (A)               | 3.5                             | 6.5                             |
